# Supplementary material
Source: Springer Nature journal article supplement (https://www.springermedizin.de/resource/supplementary/12963_2004_27_MOESM5_ESM.pdf/9572496)
Supplement: MOESM5 [file 9572496]

# Workbook for cancer Y

**HALY** = *YLL* + *YERF*

**YLL**

**YERF** (*sum across stages*)

**YERF localized**

**YERF regional**

**YERF distant**

YERF summed over 17 health states  
*by age group and sex*

YERF calculated for diagnostic phase  
*by age group and sex* (1)

YERF calculated for in-patient surgery  
*by age group and sex* (2)

YERF calculated for out-patient surgery  
*by age group and sex* (3)

⋮

YERF calculated for terminal phase  
*by age group and sex* (17)
